# Supplementary material for: An inward replacement/etching route to synthesize double-walled Cu7S4 nanoboxes and their enhanced performances in ammonia gas sensing
Source: Royal Society of Chemistry journal article supplement (doi:10.1039/b821452b), 2009-01-01

**Supplementary Information**

**Figure S1.** Schematic setup of the gas-sensing measurement.

**Figure S2.** XRD pattern of Cu<sub>2</sub>O nanocubes.

**Figure S3.** A) FESEM image of Cu<sub>2</sub>O nanocubes. Inset: high magnification image of two Cu<sub>2</sub>O nanocubes. B) TEM image of Cu<sub>2</sub>O nanocubes. Inset: the SAED of one cubic Cu<sub>2</sub>O. Scale bar: 400 nm.

**Figure S4.** PL spectra of the obtained Cu<sub>7</sub>S<sub>4</sub> nanoboxes with A) single wall, and B) double walls with exciting wavelength of 370 nm.

**Figure S5.** Room temperature time profiles of PL intensity of sensor based on double-walled Cu<sub>7</sub>S<sub>4</sub> nanoboxes to NH<sub>3</sub> for 20 cycles.

**Figure S6.** Time profiles of PL intensity of sensors based on A) single-walled and B) double-walled Cu<sub>7</sub>S<sub>4</sub> nanoboxes to water vapor at room temperature.

**Figure S1**

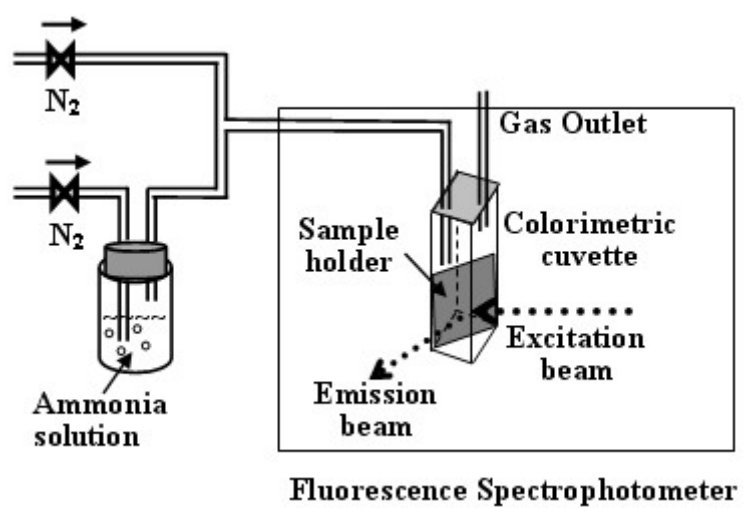

**Figure S2**

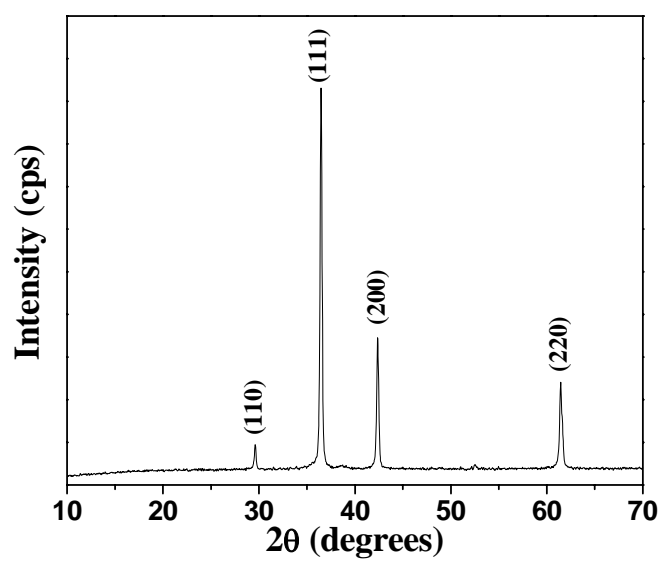

**Figure S3**

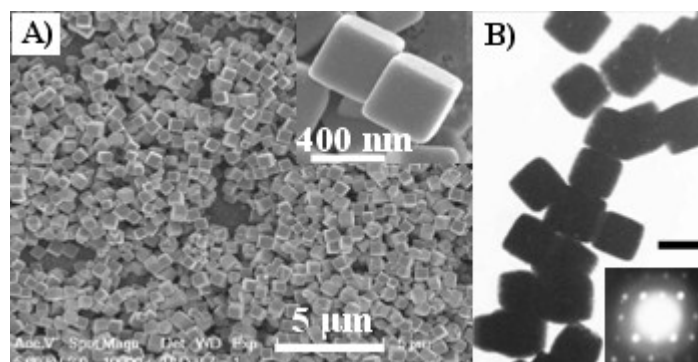

**Figure S4**

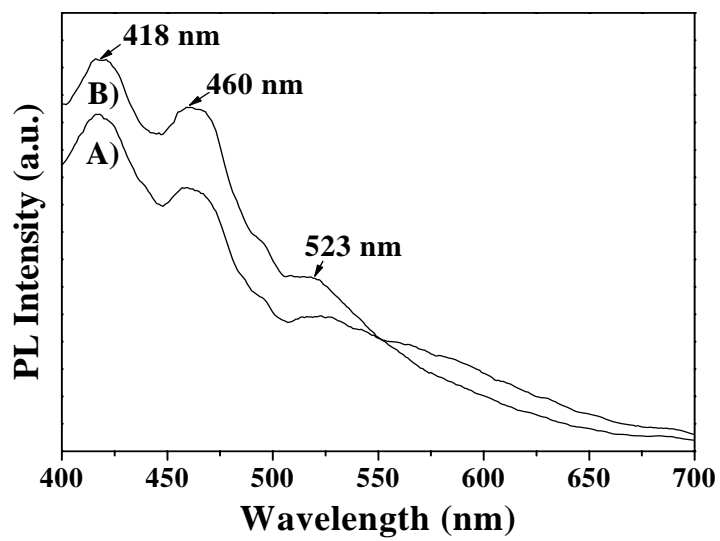

**Figure S5**

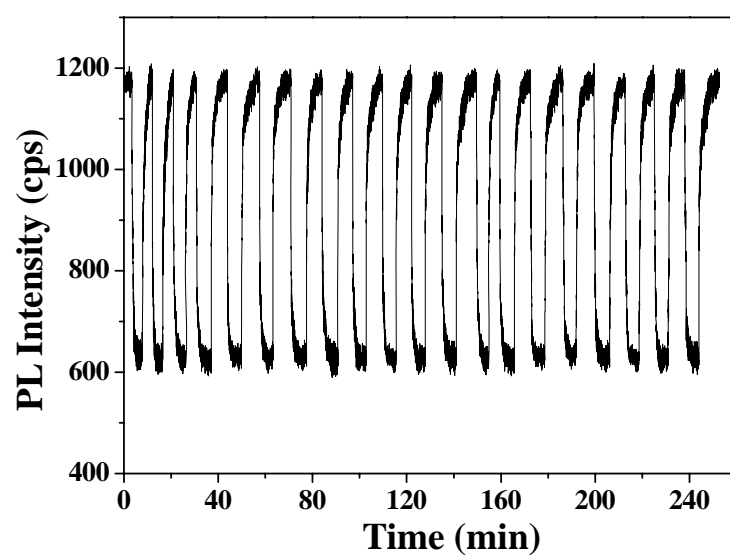

Figure S6

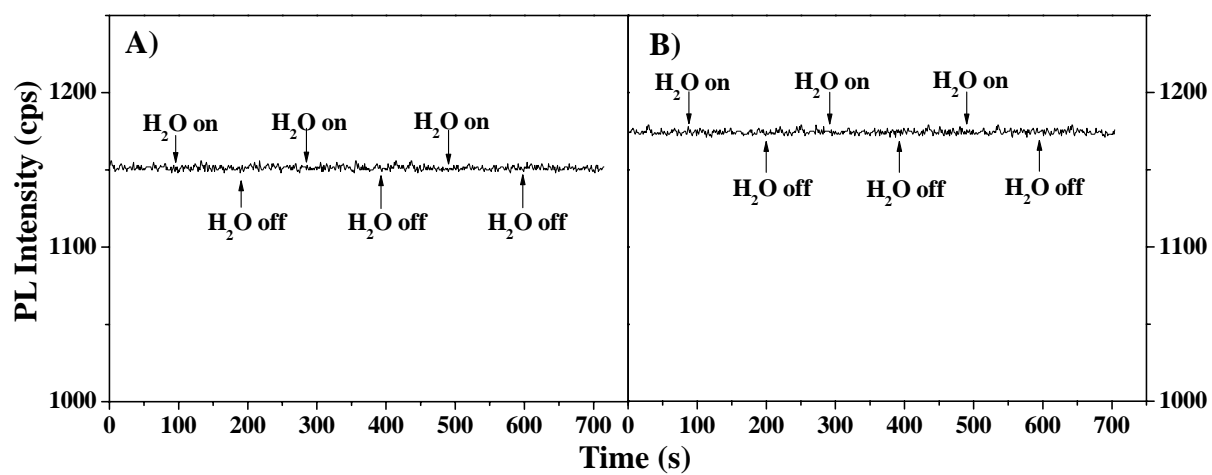

Supplement: b821452b.pdf [file b821452b.pdf]
